# Supplementary material for: Autophagy-inhibiting biomimetic nanodrugs enhance photothermal therapy and boost antitumor immunity
Source: Royal Society of Chemistry journal article supplement (doi:10.1039/d1bm01888d), 2022-01-01
Supplement: d1bm01888d1.pdf [file d1bm01888d1.pdf]

## Autophagy-inhibiting biomimetic nanodrugs enhance photothermal therapy and boost antitumor immunity

Pei-Ying Huang<sup>a</sup>, Yin-Yin, Zhu<sup>a</sup>, Hao Zhong<sup>a</sup>, Pei-Ling Chen<sup>a</sup>, Qun-Ying Shi<sup>a</sup>, Jiao-Yu Chen<sup>a</sup>, Jin-Mei Lai<sup>a</sup>, Ying-Feng Tu<sup>\*a</sup>, Shu-Wen Liu<sup>\*ab</sup>, and Li-Han Liu<sup>\*a</sup>

<sup>a</sup> Guangdong Key Laboratory of New Drug Screening, School of Pharmaceutical Sciences, Southern Medical University, Guangzhou 510515, Guangdong, P. R. China

<sup>b</sup> State Key Laboratory of Organ Failure Research, Guangdong Provincial Institute of Nephrology, Southern Medical University, Guangzhou 510515, China

### \* Corresponding E-mail address:

tuyingfeng1@smu.edu.cn (Ying-Feng Tu)

liusw@smu.edu.cn (Shu-Wen Liu)

liulihan@smu.edu.cn (Li-Han Liu)

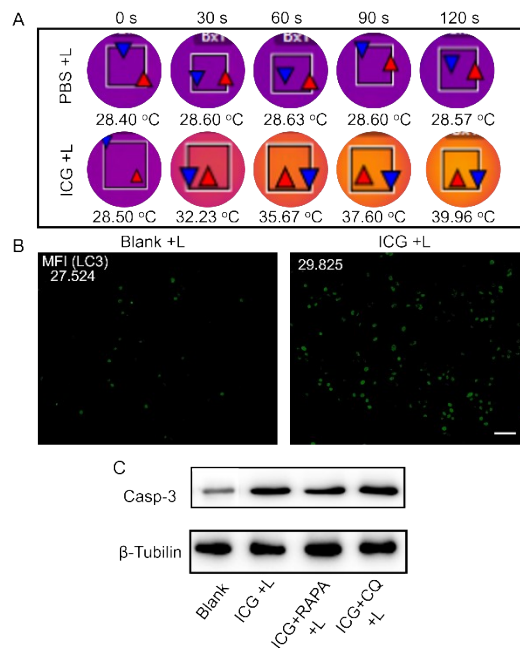

**Fig. S1.** (A) Temperature elevation of 4T1 cells with ICG of NIR laser in 96-well plate (ICG: 10  $\mu$ M, photodensity: 1.5 W  $\text{cm}^{-2}$ ) ( $n = 3$ ). (B) Representative immunofluorescence images of LC3 punctate dots after treating with ICG of NIR laser (ICG: 10  $\mu$ M, photodensity: 1.5 W  $\text{cm}^{-2}$ ). Scale bar: 50  $\mu$ m. (C) Western blot assay of Casp-3 expression in 4T1 cells after different treatments (ICG: 10  $\mu$ M, photodensity: 1.5 W  $\text{cm}^{-2}$ ). MFI means Mean fluorescence intensity.

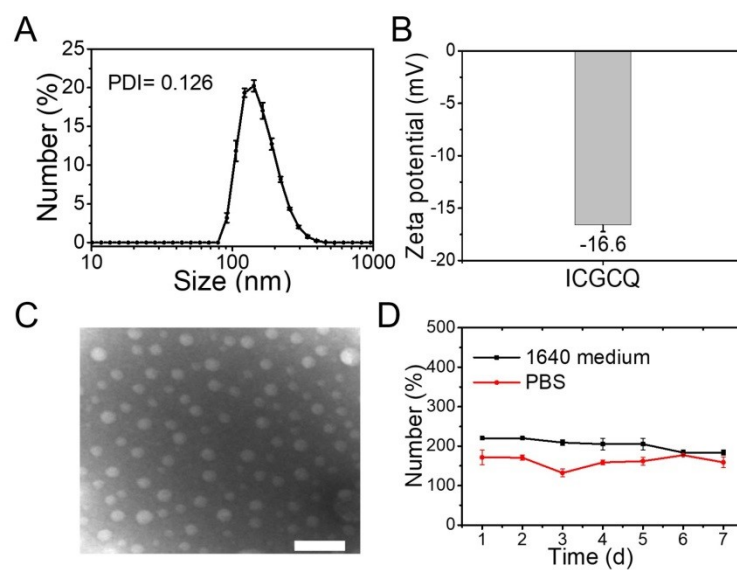

**Fig. S2.** (A) Hydrodynamic diameter and (B) the surface zeta potential values of ICGCQ. (C) The representative TEM image of ICGCQ NPs (Scale bar = 500 nm). (D) The stability of ICGCQ in PBS and 1640 medium.

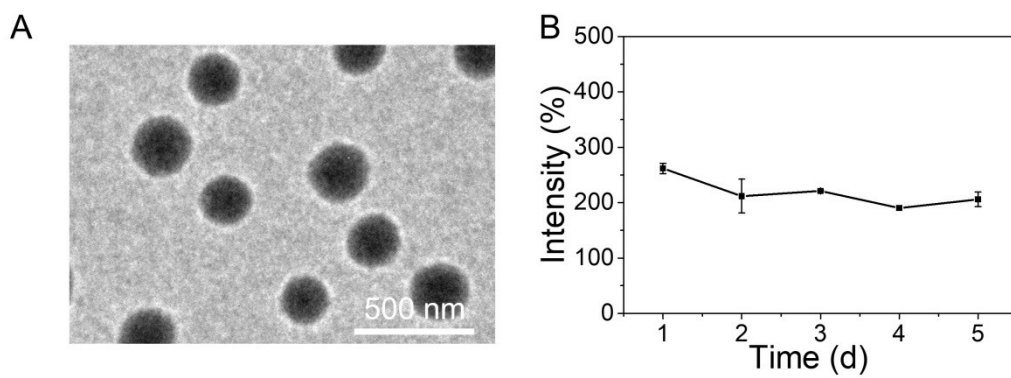

**Fig. S3.** (A) The representative TEM image of ICGCQ@RCm NPs. (B) The hydrodynamic size changes of ICGCQ@RCm NPs in PBS for 5 days.

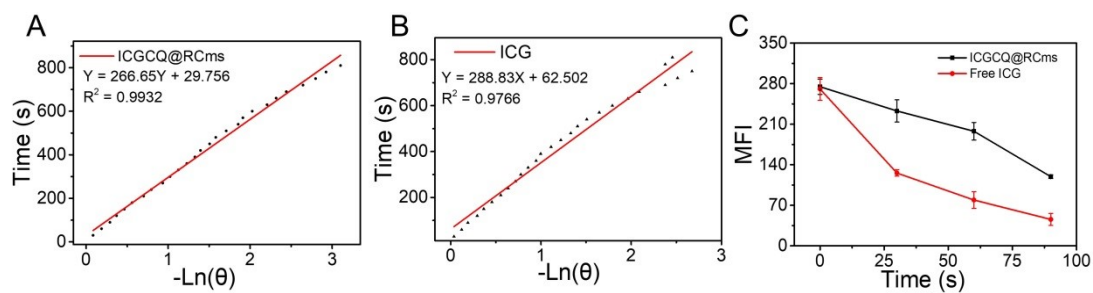

**Fig. S4.** Linear time data versus  $-\ln(\theta)$  of ICGCQ@RCms NPs (A) and ICG (B) obtained from the cooling period of NIR laser off. (C) Fluorescence intensities of ICGCQ@RCms NPs and ICG dispersions in water after laser irradiation at different times. MFI is an abbreviation for mean fluorescence intensity.

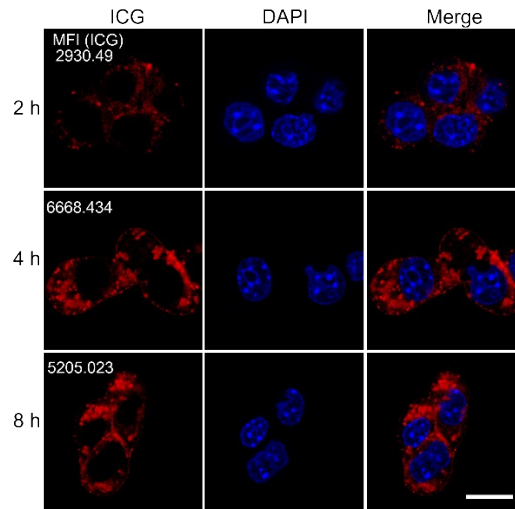

**Fig. S5.** CLSM images of 4T1 cells after treatment with ICGCQ@RCms NPs for 2, 4, and 8 h, respectively (ICG: 10  $\mu$ M). Scale bar: 40  $\mu$ m. The numbers inserted in the upper left corners are the semiquantitative mean fluorescence intensity of ICG.

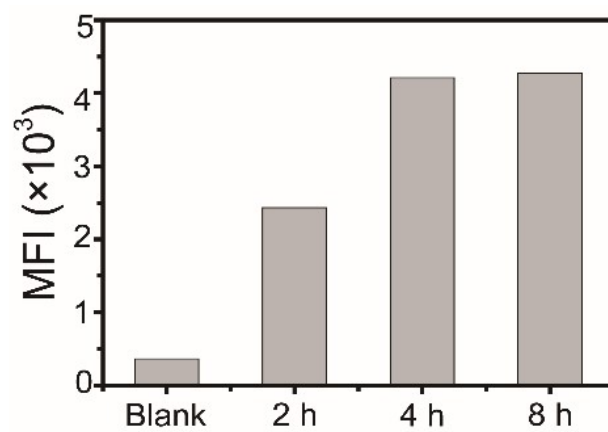

**Fig. S6.** Representative mean fluorescence intensities for 4T1 cells after treatment with ICGCQ@RCms NPs for 2, 4, and 8 h, respectively (ICG: 10  $\mu$ M).

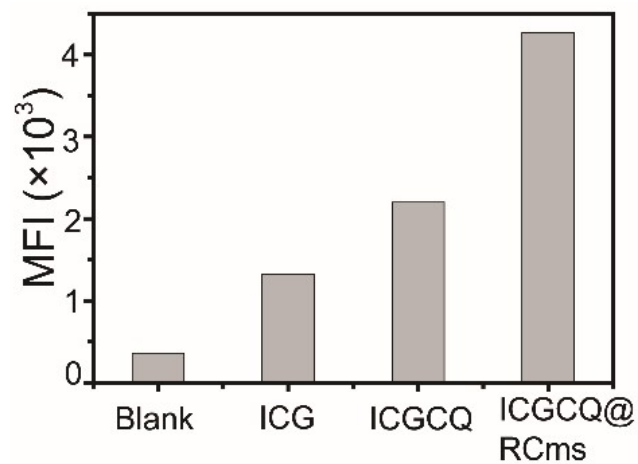

**Fig. S7.** Mean fluorescence intensities of 4 hours incubation with free ICG, ICGCQ NPs, ICGCQ@RCms NPs (ICG: 10  $\mu$ M).



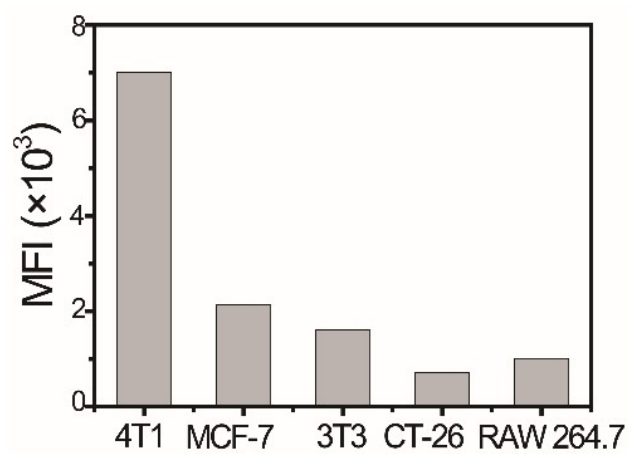

**Fig. S8.** Mean fluorescence intensities of the five cell lines 4T1, MCF-7, 3T3, CT-26 and Raw 264.7 upon 4 h incubation with ICGCQ@RCms NPs (ICG: 10  $\mu$ M).

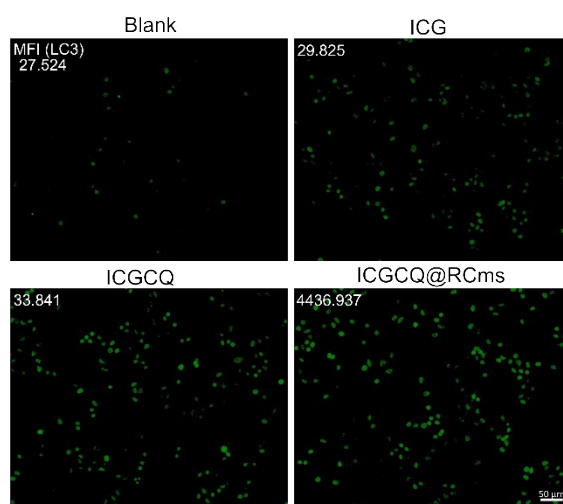

**Fig. S9.** Autophagy inhibition induced by ICGCQ@RCms NPs. Representative immunofluorescence images of LC3 punctate dots after various treatments. (photodensity:  $1.5 \text{ W cm}^{-2}$ , 60 s). Scale bar:  $50 \mu\text{m}$ . The numbers inserted in the upper left corners are the semiquantitative mean intensity of green fluorescence.

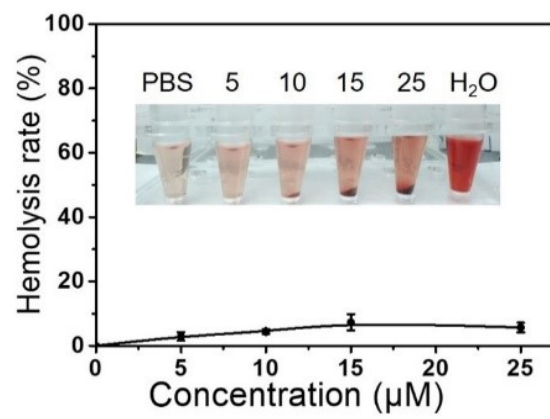

**Fig. S10.** Preliminary biosafety assessment of ICGCQ@RCms NPs.

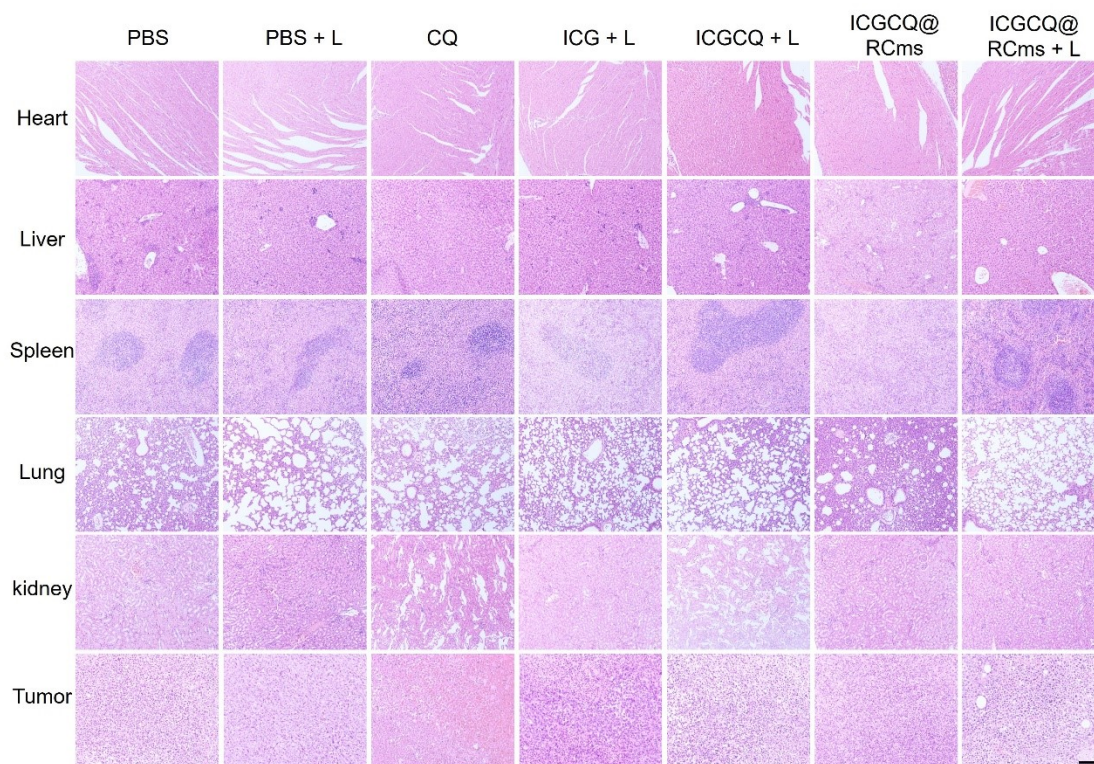

**Fig. S11.** Hematoxylin-eosin staining of the tissues (heart, liver, spleen, lung, kidney and tumor) after different treatments for assessment of toxicity (scale bars: 10  $\mu$ m).

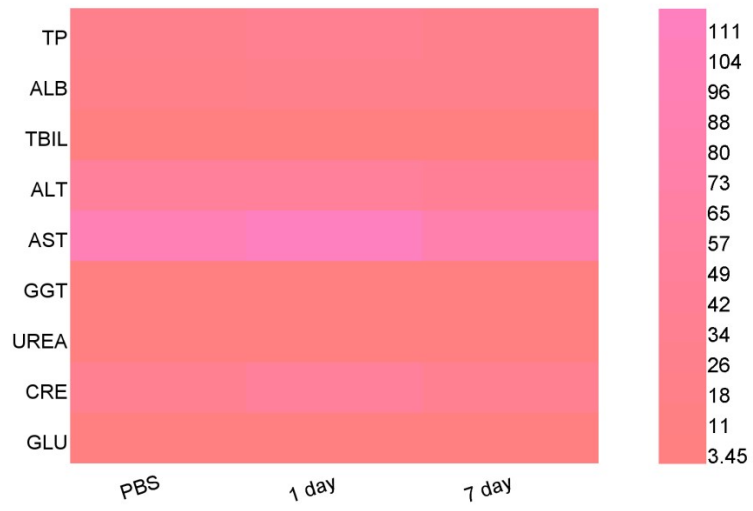

**Fig. S12.** Hematological parameters of the mice on the 1<sup>st</sup> day and 7<sup>th</sup> day ( $n = 2$ ).
